# Supplementary material
Source: PubMed Central journal article supplement (PMC10765383)
Supplement: NIHMS1941221-supplement-Supplemental_Material.pdf [file NIHMS1941221-supplement-Supplemental_Material.pdf]

## **Supplemental Materials**

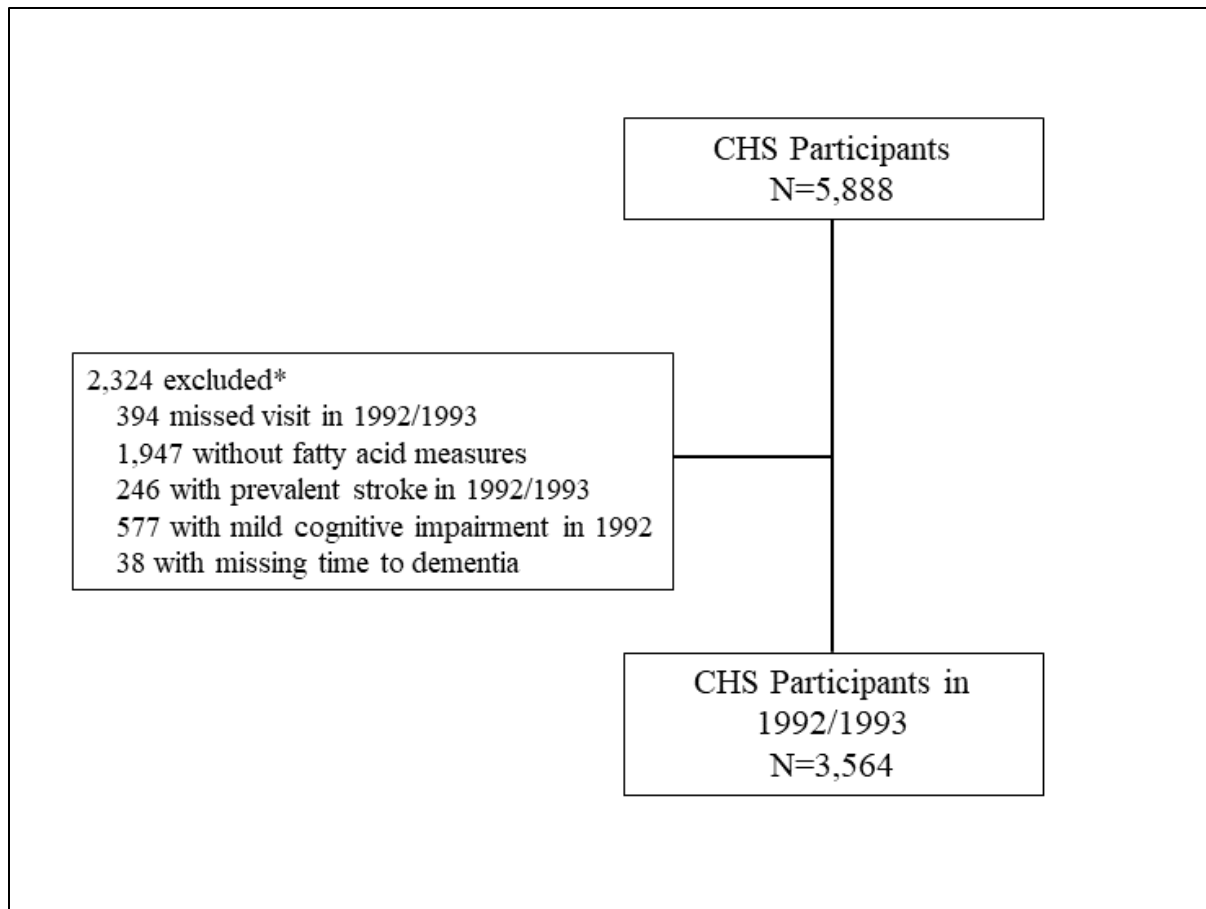

**Supplemental Figure 1.** Flowchart of CHS participants included in the present analysis.

\*categories are not mutually exclusive.

**Supplemental Table 1.** Baseline characteristics of CHS participants by eligibility status

|                                              | CHS participants with available fatty acid measures who were free of stroke and dementia in 1992/1993 | CHS Participants who did not meet inclusion Criteria |
|----------------------------------------------|-------------------------------------------------------------------------------------------------------|------------------------------------------------------|
| n                                            | 3,564                                                                                                 | 2,324                                                |
| <b>Demographics</b>                          |                                                                                                       |                                                      |
| Mean age (SD), years                         | 74.8 (5)                                                                                              | 75.5 (6)                                             |
| White, n (%)                                 | 3,146 (88)                                                                                            | 1,811 (78)                                           |
| Male, n (%)                                  | 1,413 (40)                                                                                            | 1,093 (47)                                           |
| High School or higher, n (%)                 | 2,661 (75)                                                                                            | 3,749 (72)                                           |
| <b>Annual income, n (%)</b>                  |                                                                                                       |                                                      |
| <12,000                                      | 792 (22)                                                                                              | 1,470 (27)                                           |
| \$12,000-\$24,999                            | 1,281 (36)                                                                                            | 1,932 (35)                                           |
| \$25,000-\$49,999                            | 995 (28)                                                                                              | 1,396 (25)                                           |
| >\$50,000                                    | 496 (14)                                                                                              | 710 (13)                                             |
| <b>Lifestyle</b>                             |                                                                                                       |                                                      |
| Former Smoker, n (%)                         | 1,507 (42)                                                                                            | 2,444 (42)                                           |
| Current Smoker, n (%)                        | 369 (10)                                                                                              | 700 (12)                                             |
| Mean Physical activity (SD), kcal/week       | 1,180 (1,371)                                                                                         | 1,115 (887)                                          |
| Mean Body mass index (SD), kg/m <sup>2</sup> | 26.8 (5)                                                                                              | 26.4 (5)                                             |
| Dietary Supplement Use, n (%)                | 918 (26)                                                                                              | 1,471 (25)                                           |
| <b>Health Status, n (%)</b>                  |                                                                                                       |                                                      |
| Coronary Heart Disease                       | 767 (22)                                                                                              | 582 (25)                                             |
| Atrial Fibrillation                          | 125 (4)                                                                                               | 157 (3)                                              |
| Heart Failure                                | 193 (5)                                                                                               | 128 (5.5)                                            |

**Supplemental Table 2: ICD-9 Codes for Alzheimer's disease, senile dementia or related disorders**

|        |                                                                            |
|--------|----------------------------------------------------------------------------|
| 290.0  | Senile dementia, uncomplicated                                             |
| 290.20 | Senile dementia with delusional features                                   |
| 290.21 | Senile dementia with depressive features                                   |
| 290.3  | Senile dementia with delirium                                              |
| 290.40 | Vascular dementia, uncomplicated                                           |
| 290.41 | Vascular dementia, with delirium                                           |
| 290.42 | Vascular dementia, with delusions                                          |
| 290.43 | Vascular dementia, with depressed mood                                     |
| 294.0  | Amnestic disorder in conditions classified elsewhere                       |
| 294.10 | Dementia in conditions classified elsewhere without behavioral disturbance |
| 294.11 | Dementia in conditions classified elsewhere with behavioral disturbance    |
| 294.20 | Dementia, unspecified, without behavioral disturbance                      |
| 294.21 | Dementia, unspecified, with behavioral disturbance                         |
| 294.8  | Other persistent mental disorders due to conditions classified elsewhere   |
| 331.0  | Alzheimer's disease                                                        |
| 331.11 | Pick's disease                                                             |
| 331.19 | Senile degeneration of brain                                               |
| 331.2  | Senile degeneration of brain                                               |
| 331.7  | Cerebral degeneration in diseases classified elsewhere                     |
| 797    | Senility without mention of psychosis                                      |

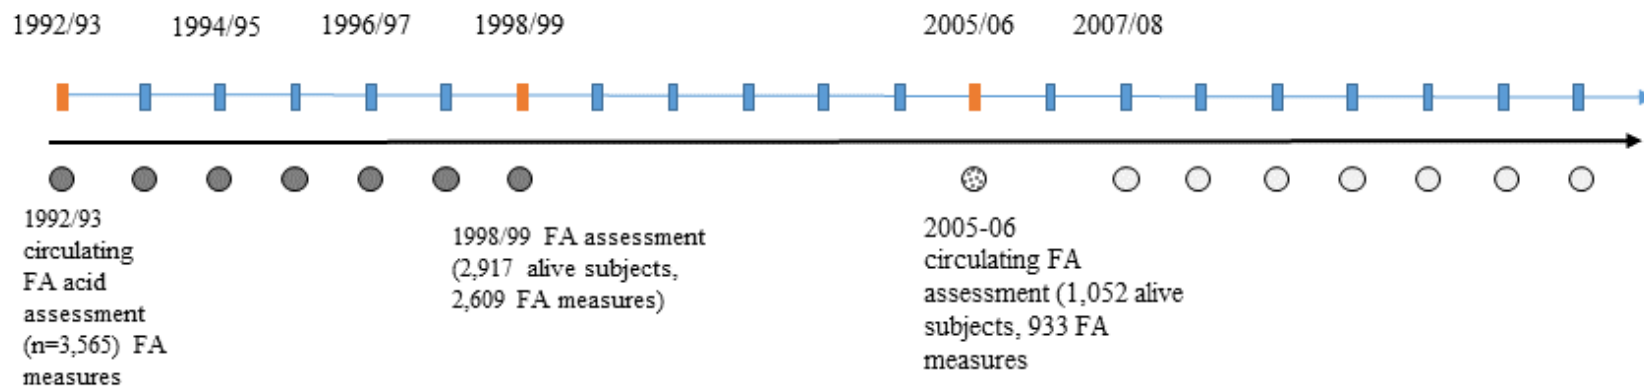

Legend

- Fatty acid measurements
- Ascertainment and diagnosis of dementia in CHS Memory study; cognitive testing using 3MSE, TICS or IQCODE
- ⊗ cognitive testing using 3MSE, TICS or IQCODE
- cognitive testing using TICS or IQCODE
- Continuous identification of dementia cases through CHS hospitalization data

**Supplemental Figure 2.** Timeline fatty acid and cognitive outcomes.

Supplemental Table 3: Correlations between cumulative average of plasma circulating fatty acids by time period<sup>1</sup>

|                    | ALA  |      |      | EPA  |      |      | DPA  |      |      | DHA  |      |       | LA    |       |       | AA    |       |       |
|--------------------|------|------|------|------|------|------|------|------|------|------|------|-------|-------|-------|-------|-------|-------|-------|
|                    | 1992 | 1998 | 2005 | 1992 | 1998 | 2005 | 1992 | 1998 | 2005 | 1992 | 1998 | 2005  | 1992  | 1998  | 2005  | 1992  | 1998  | 2005  |
| ALA, %<br>total FA |      |      |      |      |      |      |      |      |      |      |      |       |       |       |       |       |       |       |
| 1992               |      | 0.85 | 0.71 | 0.28 | 0.26 | 0.21 | 0.20 | 0.14 | 0.12 |      |      |       | 0.22  | 0.21  | 0.19  | -0.39 | -0.38 | -0.36 |
| 1998               |      |      | 0.92 | 0.23 | 0.28 | 0.25 | 0.11 |      |      |      |      |       | 0.22  | 0.23  | 0.21  | -0.36 | -0.40 | -0.39 |
| 2005               |      |      |      | 0.22 | 0.28 | 0.31 |      | 0.11 | 0.14 |      |      |       | 0.18  | 0.20  | 0.22  | -0.29 | -0.34 | -0.36 |
| EPA, %<br>total FA |      |      |      |      |      |      |      |      |      |      |      |       |       |       |       |       |       |       |
| 1992               |      |      |      |      | 0.90 | 0.77 | 0.53 | 0.47 | 0.34 | 0.45 | 0.44 | 0.38  | -0.36 | -0.34 | -0.27 | 0.09  | 0.11  |       |
| 1998               |      |      |      |      |      | 0.89 | 0.49 | 0.52 | 0.40 | 0.45 | 0.49 | 0.44  | -0.34 | -0.38 | -0.34 | 0.12  | 0.12  |       |
| 2005               |      |      |      |      |      |      | 0.35 | 0.39 | 0.43 | 0.39 | 0.43 | 0.49  | -0.27 | -0.32 | -0.34 | 0.10  | 0.11  | 0.10  |
| DPA, %<br>total FA |      |      |      |      |      |      |      |      |      |      |      |       |       |       |       |       |       |       |
| 1992               |      |      |      |      |      |      |      | 0.91 | 0.80 | 0.16 | 0.15 | 0.17  | -0.37 | -0.34 | -0.26 | 0.20  | 0.19  | 0.11  |
| 1998               |      |      |      |      |      |      |      |      | 0.94 | 0.14 | 0.15 | 0.18  | -0.34 | -0.37 | -0.33 | 0.22  | 0.22  | 0.18  |
| 2005               |      |      |      |      |      |      |      |      |      | 0.12 | 0.16 | 0.16  | -0.29 | -0.35 | -0.36 | 0.17  | 0.19  | 0.18  |
| DHA, %<br>total FA |      |      |      |      |      |      |      |      |      |      |      |       |       |       |       |       |       |       |
| 1992               |      |      |      |      |      |      |      |      |      | 0.93 | 0.85 | -0.23 | -0.23 | -0.22 |       |       |       |       |
| 1998               |      |      |      |      |      |      |      |      |      |      | 0.94 | -0.23 | -0.27 | -0.24 | 0.04  | 0.05  |       |       |
| 2005               |      |      |      |      |      |      |      |      |      |      |      | -0.21 | -0.26 | -0.27 | 0.04  | 0.03  | 0.04  |       |
| LA, %<br>total FA  |      |      |      |      |      |      |      |      |      |      |      |       |       |       |       |       |       |       |
| 1992               |      |      |      |      |      |      |      |      |      |      |      |       |       | 0.92  | 0.81  | -0.62 | -0.60 | -0.53 |
| 1998               |      |      |      |      |      |      |      |      |      |      |      |       |       |       | 0.93  | -0.61 | -0.64 | -0.57 |
| 2005               |      |      |      |      |      |      |      |      |      |      |      |       |       |       |       | -0.56 | -0.58 | -0.60 |
| AA, %<br>total FA  |      |      |      |      |      |      |      |      |      |      |      |       |       |       |       |       |       |       |
| 1992               |      |      |      |      |      |      |      |      |      |      |      |       |       |       |       |       | 0.95  | 0.87  |
| 1998               |      |      |      |      |      |      |      |      |      |      |      |       |       |       |       |       |       | 0.96  |

<sup>1</sup>Estimated using partial Spearman correlation analysis adjusting for age, sex, race. Only statistically significant coefficients (p-value < 0.05) are shown. N= 1,999 for correlations between 1992 and 1998 and n=332 for correlations with 2005 measures. AA, arachidonic acid; ALA, alpha-linolenic acid; DHA, docosahexaenoic acid; DPA, docosapentaenoic acid; EPA, eicosapentaenoic acid; LA, linoleic acid; FA, fatty acid.
